# Supplementary material
Source: PubMed Central journal article supplement (PMC1562472)
Supplement: bmj_38905.447118.2F_1.pdf [file bmj_38905.447118.2F_1.pdf]

**Appendix 1: Structured assessment form for evaluating compliance in patients receiving polypharmacy [as supplied by the authors]**

Name: \_\_\_\_\_ (Chinese) \_\_\_\_\_ Age/Sex: \_\_\_\_\_ Assessment Date: \_\_\_\_\_  
 ID no: \_\_\_\_\_ Tel: \_\_\_\_\_ Doctor's name: \_\_\_\_\_

| Drug    | Prescribed Regimen | Patient's Regimen | Drug left | % | Comments | Drug Compliance<br><input type="checkbox"/> Good<br><input type="checkbox"/> Doubtful<br><input type="checkbox"/> Poor<br><br>Main Problems:<br><input type="checkbox"/> Forgetting<br><input type="checkbox"/> Lack of understanding<br><input type="checkbox"/> Deliberate non-compliance<br><br>Self-administered drugs <input type="checkbox"/> yes <input type="checkbox"/> no<br>Ability to read label <input type="checkbox"/> yes <input type="checkbox"/> no<br>Live alone <input type="checkbox"/> yes <input type="checkbox"/> no<br><br><i>Home monitoring</i><br>BP:<br>H'stix: (f) (2hpp)<br>Urine stix:<br><input type="checkbox"/> no home monitoring<br><br><i>Puff Technique</i><br><input type="checkbox"/> Good <input type="checkbox"/> Poor _____<br>With Volumatic <input type="checkbox"/> ✓ <input type="checkbox"/> ✗ _____<br><br><i>TNG</i><br>Administration <input type="checkbox"/> ✓ <input type="checkbox"/> ✗ _____<br>Storage <input type="checkbox"/> ✓ <input type="checkbox"/> ✗ _____<br>Expiry Date <input type="checkbox"/> ✓ <input type="checkbox"/> ✗ _____ |
|---------|--------------------|-------------------|-----------|---|----------|---------------------------------------------------------------------------------------------------------------------------------------------------------------------------------------------------------------------------------------------------------------------------------------------------------------------------------------------------------------------------------------------------------------------------------------------------------------------------------------------------------------------------------------------------------------------------------------------------------------------------------------------------------------------------------------------------------------------------------------------------------------------------------------------------------------------------------------------------------------------------------------------------------------------------------------------------------------------------------------------------------------------------------------------------------------------------------------------------------|
|         |                    |                   |           |   |          |                                                                                                                                                                                                                                                                                                                                                                                                                                                                                                                                                                                                                                                                                                                                                                                                                                                                                                                                                                                                                                                                                                         |
|         |                    |                   |           |   |          |                                                                                                                                                                                                                                                                                                                                                                                                                                                                                                                                                                                                                                                                                                                                                                                                                                                                                                                                                                                                                                                                                                         |
|         |                    |                   |           |   |          |                                                                                                                                                                                                                                                                                                                                                                                                                                                                                                                                                                                                                                                                                                                                                                                                                                                                                                                                                                                                                                                                                                         |
|         |                    |                   |           |   |          |                                                                                                                                                                                                                                                                                                                                                                                                                                                                                                                                                                                                                                                                                                                                                                                                                                                                                                                                                                                                                                                                                                         |
|         |                    |                   |           |   |          |                                                                                                                                                                                                                                                                                                                                                                                                                                                                                                                                                                                                                                                                                                                                                                                                                                                                                                                                                                                                                                                                                                         |
|         |                    |                   |           |   |          |                                                                                                                                                                                                                                                                                                                                                                                                                                                                                                                                                                                                                                                                                                                                                                                                                                                                                                                                                                                                                                                                                                         |
| Remarks |                    |                   |           |   |          |                                                                                                                                                                                                                                                                                                                                                                                                                                                                                                                                                                                                                                                                                                                                                                                                                                                                                                                                                                                                                                                                                                         |

Compliance level: 80-120% (good), <80% or >120% (poor)

Patient Satisfaction: Yes No

Overall Compliance \_\_\_\_\_
